# Supplementary material for: Ser7 Phosphorylation of the CTD Recruits the RPAP2 Ser5 Phosphatase to snRNA Genes
Source: PubMed Central journal article supplement (PMC3262128; doi:10.1016/j.molcel.2011.11.006), 2012-01-13
Supplement: mmc1.pdf [file mmc1.pdf]

## Supplemental Information

### Ser7 Phosphorylation of the CTD Recruits the RPAP2 Ser5 Phosphatase to snRNA Genes

Sylvain Egloff, Justyna Zaborowska, Clélia Laitem, Tamás Kiss, and Shona Murphy

**Inventory of Supplemental Information** (supplemental information contains Figure S1 to S6, Table S1 and S2, Supplemental experimental procedures and supplemental references).

#### Figure S1, related to Figure 1

This figure describes the data from the proteomic analysis of the two distinct complexes identified in Figure 1C.

Figure S1A shows a silver stain of the proteins in the two complexes that were subjected to mass spectrometry.

Figure S1B,C integrates the data from Mass Spectrometry with previous data on proteins interacting with Pol II and RPAP2.

#### Figure S2, related to Figure 2

This figure shows the cellular localisation of the ectopically-expressed proteins described in Figure 2.

#### Figure S3, related to Figure 3

Panel (A) of this figure shows the association of Myc-tagged RPAP2 with the *U2 snRNA* genes, as measured by ChIP, in comparison to the association of Flag-tagged RPAP2 shown in Figure 3B.

Panel (B) of this figure shows that the ectopically-expressed, epitope-tagged versions of RPAP2 are expressed at approximately the same level as the endogenous protein.

#### Figure S4, related to Figure 4

This Figure shows that Int4 binds to the Pol II CTD only when the CTD is phosphorylated and Ser7 is not mutated, in common with RPAP2, as shown in Figure 4.

#### Figure S5, related to Figure 5

Panel (A) of this figure shows the effect of knockdown of RPAP2 on the level of Int5 and Int11, shown in Figure 5C, relative to the effect on Pol II, shown in Figure 5E. This supports the notion that loss of Int5 and Int11 is not solely due to loss of Pol II.

Panels (B), (C), (D) and (E) show the effect of knock down of Int4 on processing of transcripts of *U2 snRNA* genes, transcription, Pol II levels and Int11 association, as a comparison to the effects of RPAP2 knockdown described in Figure 5A-E.

#### Figure S6, related to Figure 6

This figure shows that antibodies to phospho-Ser2, -Ser5 and -Ser7 recognise the CTD specifically after in vitro phosphorylation with purified P-TEFb. This in vitro-phosphorylated CTD was used for the experiments in Figure 6C,D.

Table S1 and Table S2 (related to Figure 1) give the proteins in the two complexes identified by Mass Spectrometry.

**A**

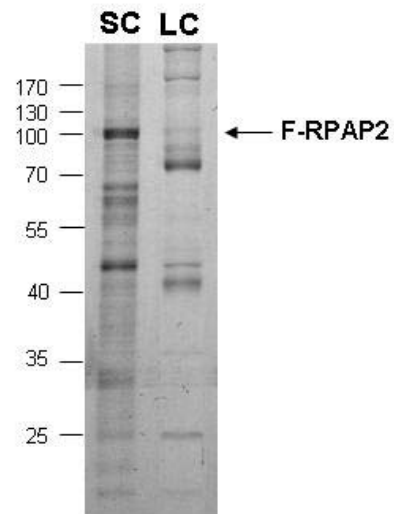

**Figure S1 (related to Figure 1). Identification of RPAP2-interacting proteins in the SC and the LC. (A) Silver staining of RPAP2-containing small (SC) and large (LC) complexes. Proteins from the SC and the LC were identified by mass spectrometry (See Table S1 and S2).**

**B**

| Protein name |
|--------------|
| POLR2A       |
| POLR2B       |
| POLR2E       |
| POLR2G       |
| POLR2H       |
| XAB1/GPN1    |
| GPN3         |
| PPP2R1A      |
| DDX3X        |

**C**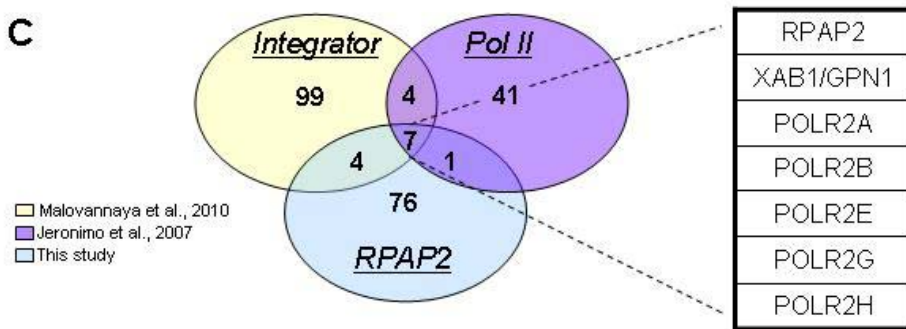

**Figure S1. (B)** List of Integrator-interacting proteins (Malovannaya et al., 2010) found to interact with RPAP2 (from Table S1). **(C)** Diagram showing the relationships among Integrator, Pol II and RPAP2-associated proteins. The list of proteins interacting with Pol II, Integrator and RPAP2 is indicated on the right.

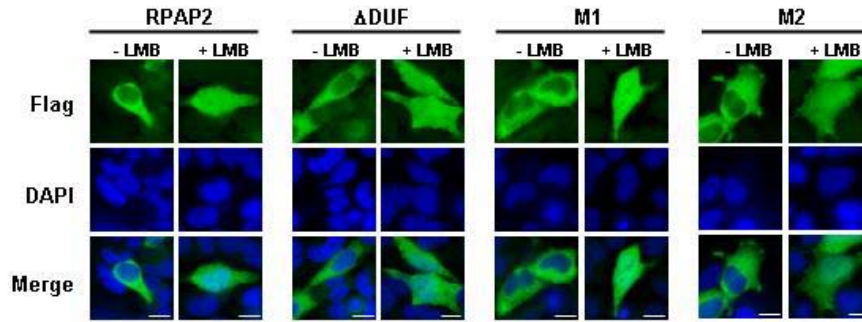

**Figure S2 (related to Figure 2). F-RPAP2 proteins shuttle between nucleus and cytoplasm in a CRM1-dependent manner.** Localization of F-RPAP2 proteins with or without treatment with leptomycin B (LMB, 20ng/ml) for 2 hours was determined by fluorescence microscopy. Cells were stained with anti-Flag (in green) and DAPI (in blue) to visualize the nuclei. Scale: 10 $\mu$ m.

**A**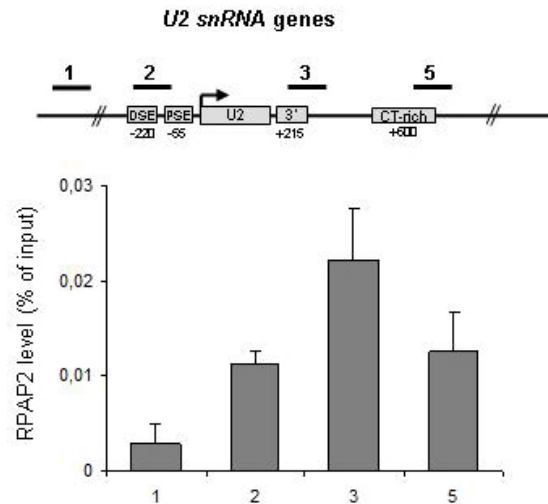**B**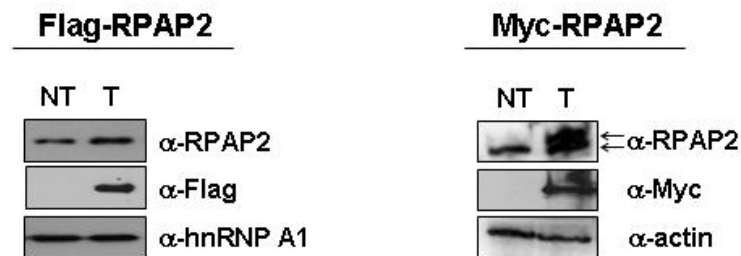

**Figure S3 (related to Figure 3). Myc-RPAP2 is recruited to *U2 snRNA* genes and Flag- and Myc-RPAP2 are expressed at the same level as the endogenous protein. (A)** ChIP assay was performed in 293 cells using anti-Myc antibody against Myc-RPAP2. The regions amplified are noted on the diagram of *U2 snRNA* genes above. Error bars indicate the standard deviation obtained from at least three independent experiments. **(B)** Extracts from non-transfected (NT) or transfected (T) cells were analyzed by western blot using antibodies directed against RPAP2, Flag, Myc, actin and hnRNP A1 proteins

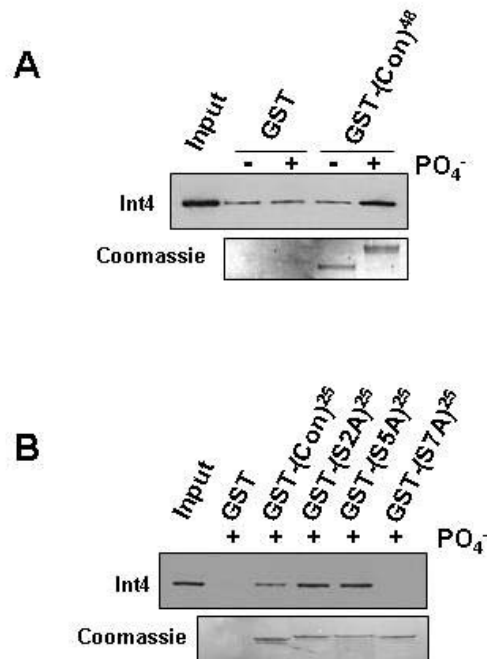

**Figure S4 (related to Figure 4). Ser7P is required for Int4 binding to the Pol II CTD. (A)** P11 fraction containing the Integrator complex (Egloff et al.; 2007) was incubated with GST alone or GST-CTD (Con)<sup>48</sup>, phosphorylated or not, and Int4 binding was monitored by western blot analysis. The bottom panel represents Coomassie blue staining of the input GST-CTD. **(B)** The P11 fraction containing the Integrator complex was incubated with *in vitro*-phosphorylated GST-CTD and Int4 binding to the WT CTD (Con)<sup>25</sup> and mutant (Ser2A/Ser5A/Ser7A)<sup>25</sup> CTDs assayed by Western blot analysis. The bottom panel represents Coomassie blue staining of the input GST-CTD.

**A**

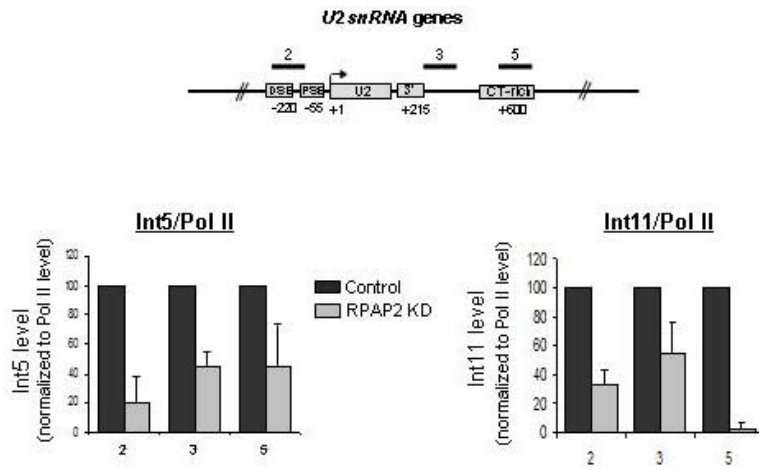

**Figure S5 (related to Figure 5). RPAP2 or Int4 knockdown affects Integrator recruitment to and expression of *U2 snRNA* genes. (A) Effect of RPAP2 KD on the Int5 and In11 subunits of Integrator recruitment onto *U2 snRNA* encoding region, relative to Pol II. The regions analyzed are noted on the diagram of *U2 snRNA* genes above. Error bars indicate the standard deviation obtained from at least three independent experiments.**

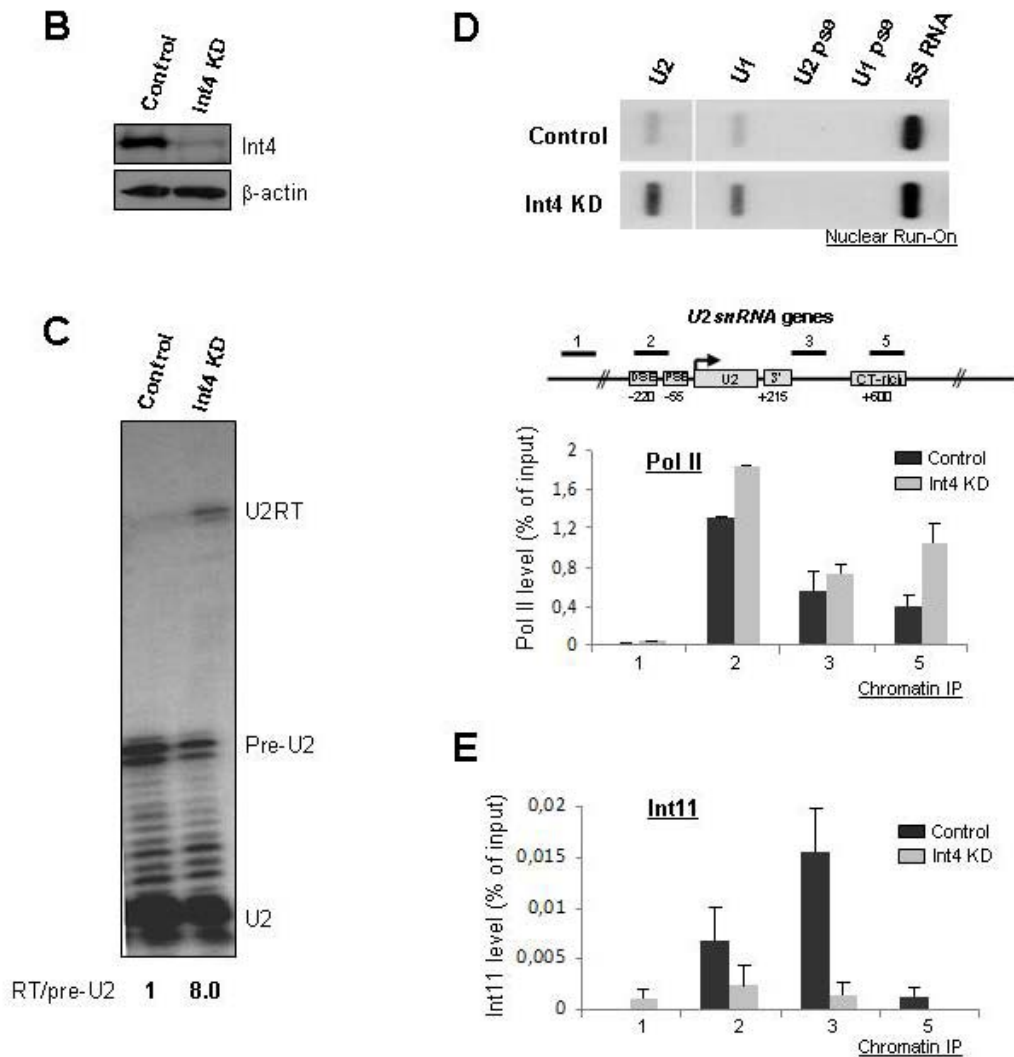

**Figure S5.** (B) Efficiency of Int4 knockdown was monitored by Western blot using antibodies against Int4 and  $\beta$ -actin. (C) RNase protection analysis of transcripts from endogenous *U2 snRNA* genes in control cells or cells transfected with an siRNA specific for Int4. The different RNA species are noted on the right side. (D) (upper panel) Nuclear run-on analysis with and without RNAi-mediated knockdown of Int4 is shown. An oligonucleotide complementary to transcripts from the Pol III-transcribed *5S rRNA* gene was used as a control for the level of transcription. (Bottom panel) qPCR quantitation of ChIP analysis of *U2 snRNA* genes using an antibody against Pol II, after Int4 KD. The regions amplified are shown on the diagram at the top. (E) qPCR quantitation of ChIP analysis using an antibody against Int11, after Int4 KD. The regions amplified are the same as in (C). Error bars indicate the standard deviation obtained from at least three independent experiments.



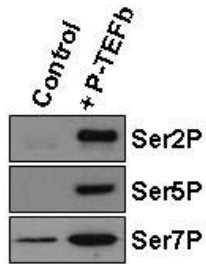

**Figure S6 (related to Figure 6). Purified P-TEFb phosphorylates Ser2, Ser5 and Ser7 *in vitro*.** Endogenous P-TEFb purified from G3H cells expressing HA-CyclinT1 was used for kinase reaction (see Materials & Methods). The same procedure was performed with HeLa cells as a negative control. Phosphorylation of GST-CTD was visualized by western blot using antibodies against Ser2P, Ser5P and Ser7P.

**Table S1. List of the interaction partners of RPAP2 within the SC and the LC**  
Mascot score, number of peptides, % coverage and emPAI values are indicated for each protein (positive identification: at least 2 unique peptides with length greater than 8 amino-acids, the limit of Mascot score $\geq$ 60 is indicated).

| Small Complex               |              |              |          |            |       |
|-----------------------------|--------------|--------------|----------|------------|-------|
|                             | Protein name | Mascot Score | Peptides | % coverage | emPAI |
| <a href="#">IPI00027251</a> | STK38        | 444          | 28       | 53         | 2,29  |
| <a href="#">IPI00293375</a> | RPAP2        | 402          | 39       | 49         | 1,17  |
| <a href="#">IPI00375731</a> | RBM10        | 367          | 25       | 28         | 0,53  |
| <a href="#">IPI00021439</a> | ACTB         | 315          | 13       | 38         | 1,16  |
| <a href="#">IPI00470580</a> | GPN3         | 254          | 7        | 28         | 0,71  |
| <a href="#">IPI00237011</a> | STK38L       | 243          | 24       | 54         | 1,22  |
| <a href="#">IPI00004511</a> | PFKFB3       | 222          | 12       | 28         | 0,61  |
| <a href="#">IPI00479743</a> | POTEE        | 217          | 9        | 9          | 0,19  |
| <a href="#">IPI00413755</a> | TAF4         | 207          | 14       | 19         | 0,26  |
| <a href="#">IPI00027035</a> | GPN1         | 206          | 7        | 21         | 0,51  |
| <a href="#">IPI00792677</a> | TUBA1B       | 184          | 7        | 26         | 0,59  |
| <a href="#">IPI00216049</a> | HNRNPK       | 181          | 12       | 41         | 0,64  |
| <a href="#">IPI00003865</a> | HSPA8        | 176          | 12       | 25         | 0,66  |
| <a href="#">IPI00012079</a> | EIF4B        | 173          | 21       | 33         | 0,51  |
| <a href="#">IPI00215965</a> | HNRNPA1      | 167          | 12       | 30         | 0,59  |
| <a href="#">IPI00013881</a> | HNRNPH1      | 156          | 8        | 23         | 0,34  |
| <a href="#">IPI00003362</a> | HSPA5        | 141          | 10       | 20         | 0,35  |
| <a href="#">IPI00291802</a> | LMO7         | 128          | 5        | 8          | 0,13  |
| <a href="#">IPI00550655</a> | SPIN1        | 127          | 9        | 41         | 0,82  |
| <a href="#">IPI00292000</a> | PRPF31       | 127          | 11       | 23         | 0,48  |
| <a href="#">IPI00027834</a> | HNRNPL       | 125          | 5        | 12         | 0,18  |
| <a href="#">IPI00104050</a> | THRAP3       | 124          | 19       | 15         | 0,22  |
| <a href="#">IPI00106955</a> | C11orf84     | 117          | 5        | 20         | 0,42  |
| <a href="#">IPI00013415</a> | RPS7         | 109          | 3        | 14         | 0,38  |
| <a href="#">IPI00441473</a> | PRMT5        | 107          | 10       | 19         | 0,28  |
| <a href="#">IPI00179964</a> | PTBP1        | 106          | 7        | 22         | 0,37  |
| <a href="#">IPI00107745</a> | LUC7L3       | 104          | 4        | 14         | 0,23  |
| <a href="#">IPI00007765</a> | HSPA9        | 98           | 8        | 19         | 0,16  |
| <a href="#">IPI00301503</a> | TRA2B        | 97           | 4        | 18         | 0,24  |
| <a href="#">IPI00008433</a> | RPS5         | 95           | 4        | 14         | 0,36  |
| <a href="#">IPI00419373</a> | HNRNPA3      | 94           | 5        | 25         | 0,31  |
| <a href="#">IPI00012202</a> | WDR77        | 93           | 5        | 9          | 0,33  |
| <a href="#">IPI00418471</a> | VIM          | 90           | 4        | 10         | 0,22  |
| <a href="#">IPI00011253</a> | RPS3         | 86           | 7        | 38         | 0,49  |
| <a href="#">IPI00299155</a> | PSMA4        | 84           | 2        | 17         | 0,27  |
| <a href="#">IPI00215637</a> | DDX3X        | 84           | 4        | 8          | 0,16  |
| <a href="#">IPI00396485</a> | EEF1A1       | 79           | 8        | 21         | 0,24  |
| <a href="#">IPI00218895</a> | POLR2G       | 78           | 3        | 22         | 0,44  |
| <a href="#">IPI00290566</a> | TCP1         | 77           | 3        | 8          | 0,13  |
| <a href="#">IPI00015922</a> | DDX26        | 77           | 3        | 5          | 0,12  |
| <a href="#">IPI00553169</a> | FLNA         | 74           | 4        | 2          | 0,06  |
| <a href="#">IPI00738381</a> | EEF1G        | 71           | 2        | 5          | 0,15  |
| <a href="#">IPI00396435</a> | DHX15        | 70           | 4        | 6          | 0,13  |
| <a href="#">IPI00328840</a> | THOC4        | 69           | 3        | 20         | 0,29  |
| <a href="#">IPI00301936</a> | ELAVL1       | 68           | 4        | 12         | 0,32  |

|                             |           |    |    |    |      |
|-----------------------------|-----------|----|----|----|------|
| <a href="#">IPI00019459</a> | TAB1      | 66 | 3  | 11 | 0,14 |
| <a href="#">IPI00026612</a> | PPM1B     | 66 | 3  | 9  | 0,07 |
| <a href="#">IPI00007334</a> | ACIN1     | 64 | 3  | 3  | 0,05 |
| <a href="#">IPI00413672</a> | BCLAF1    | 63 | 13 | 17 | 0,11 |
| <a href="#">IPI00009328</a> | EIF4A3    | 63 | 6  | 26 | 0,36 |
| <a href="#">IPI00063234</a> | PRKAR2A   | 61 | 3  | 11 | 0,09 |
| <a href="#">IPI00027626</a> | CCT6A     | 60 | 3  | 9  | 0,13 |
| <a href="#">IPI00005613</a> | U2AF1     | 60 | 2  | 5  | 0,28 |
| <a href="#">IPI00018140</a> | SYNCRIP   | 57 | 5  | 13 | 0,17 |
| <a href="#">IPI00444262</a> | NCL       | 57 | 2  | 5  | 0,12 |
| <a href="#">IPI00396218</a> | SCYL2     | 53 | 7  | 6  | 0,07 |
| <a href="#">IPI00010720</a> | CCT5      | 53 | 2  | 5  | 0,06 |
| <a href="#">IPI00964686</a> | HNRNPAB   | 52 | 4  | 21 | 0,12 |
| <a href="#">IPI00386043</a> | C1orf27   | 52 | 2  | 7  | 0,07 |
| <a href="#">IPI00554737</a> | PPP2R1A   | 51 | 4  | 10 | 0,12 |
| <a href="#">IPI00297779</a> | CCT2      | 48 | 2  | 6  | 0,06 |
| <a href="#">IPI00396378</a> | HNRNPA2B1 | 47 | 8  | 34 | 0,46 |
| <a href="#">IPI00939530</a> | SRSF7     | 46 | 5  | 48 | 0,24 |
| <a href="#">IPI00302927</a> | CCT4      | 45 | 2  | 5  | 0,04 |
| <a href="#">IPI00216592</a> | HNRNPC    | 33 | 3  | 16 | 0,12 |
| <a href="#">IPI00010204</a> | SRSF3     | 31 | 4  | 26 | 0,43 |
| <a href="#">IPI00030243</a> | PSME3     | 30 | 3  | 15 | 0,27 |
| <a href="#">IPI00514032</a> | CCT3      | 26 | 3  | 21 | 0,12 |

| Large Complex               |              |              |          |            |       |
|-----------------------------|--------------|--------------|----------|------------|-------|
|                             | Protein name | Mascot Score | Peptides | % coverage | emPAI |
| <a href="#">IPI00218895</a> | POLR2G       | 123          | 6        | 44         | 1,06  |
| <a href="#">IPI00003309</a> | POLR2H       | 121          | 4        | 39         | 0,5   |
| <a href="#">IPI00021439</a> | ACTB         | 106          | 11       | 41         | 0,67  |
| <a href="#">IPI00293375</a> | RPAP2        | 99           | 10       | 29         | 0,37  |
| <a href="#">IPI00479743</a> | POTEE        | 68           | 5        | 5          | 0,06  |
| <a href="#">IPI00291093</a> | POLR2E       | 45           | 2        | 14         | 0,15  |
| <a href="#">IPI00022774</a> | VCP          | 44           | 2        | 4          | 0,04  |
| <a href="#">IPI00021428</a> | ACTA1        | 36           | 8        | 23         | 0,29  |
| <a href="#">IPI00031627</a> | POLR2A       | 33           | 5        | 3          | 0,03  |
| <a href="#">IPI00003865</a> | HSPA8        | 30           | 2        | 8          | 0,05  |
| <a href="#">IPI00014424</a> | EEF1A2       | 28           | 2        | 4          | 0,07  |
| <a href="#">IPI00216518</a> | IL7R         | 27           | 2        | 4          | 0,12  |
| <a href="#">IPI00007188</a> | SLC25A5      | 24           | 2        | 8          | 0,11  |
| <a href="#">IPI00025447</a> | EEF1A1       | 23           | 3        | 7          | 0,16  |
| <a href="#">IPI00027808</a> | POLR2B       | 15           | 3        | 3          | 0,06  |

**Figure S1, Table 2. List of the interaction partners of RPAP2 within the SC and the LC after removal of frequent Flag-IP contaminant proteins (Dunham et al., 2011). Mascot score, number of peptides, % coverage and emPAI values are indicated for each protein (positive identification: at least 2 unique peptides with length greater than 8 amino-acids, Mascot score $\geq$ 60).**

| Small Complex               |              |              |          |            |       |
|-----------------------------|--------------|--------------|----------|------------|-------|
|                             | Protein name | Mascot Score | Peptides | % coverage | emPAI |
| <a href="#">IPI00293375</a> | RPAP2        | 402          | 39       | 49         | 1,17  |
| <a href="#">IPI00470580</a> | GPN3         | 254          | 7        | 28         | 0,71  |
| <a href="#">IPI00413755</a> | TAF4         | 207          | 14       | 19         | 0,26  |
| <a href="#">IPI00027035</a> | GPN1         | 206          | 7        | 21         | 0,51  |
| <a href="#">IPI00216049</a> | HNRNPK       | 181          | 12       | 41         | 0,64  |
| <a href="#">IPI00291802</a> | LMO7         | 128          | 5        | 8          | 0,1   |
| <a href="#">IPI00292000</a> | PRPF31       | 127          | 11       | 23         | 0,48  |
| <a href="#">IPI00013415</a> | RPS7         | 109          | 3        | 14         | 0,38  |
| <a href="#">IPI00179964</a> | PTBP1        | 106          | 7        | 22         | 0,37  |
| <a href="#">IPI00107745</a> | LUC7L3       | 104          | 4        | 14         | 0,23  |
| <a href="#">IPI00301503</a> | TRA2B        | 97           | 4        | 18         | 0,24  |
| <a href="#">IPI00215637</a> | DDX3X        | 84           | 4        | 8          | 0,16  |
| <a href="#">IPI00218895</a> | POLR2G       | 78           | 3        | 22         | 0,44  |
| <a href="#">IPI00290566</a> | TCP1         | 77           | 3        | 8          | 0,13  |
| <a href="#">IPI00015922</a> | DDX26        | 77           | 3        | 5          | 0,12  |
| <a href="#">IPI00328840</a> | THOC4        | 69           | 3        | 20         | 0,29  |
| <a href="#">IPI00301936</a> | ELAVL1       | 68           | 4        | 12         | 0,32  |
| <a href="#">IPI00019459</a> | TAB1         | 66           | 3        | 11         | 0,14  |
| <a href="#">IPI00026612</a> | PPM1B        | 66           | 3        | 9          | 0,07  |
| <a href="#">IPI00413672</a> | BCLAF1       | 63           | 13       | 17         | 0,11  |
| <a href="#">IPI00009328</a> | EIF4A3       | 63           | 6        | 26         | 0,36  |
| <a href="#">IPI00063234</a> | PRKAR2A      | 61           | 3        | 11         | 0,09  |
| <a href="#">IPI00027626</a> | CCT6A        | 60           | 3        | 9          | 0,13  |

| Large Complex               |              |              |          |            |       |
|-----------------------------|--------------|--------------|----------|------------|-------|
|                             | Protein name | Mascot Score | Peptides | % coverage | emPAI |
| <a href="#">IPI00218895</a> | POLR2G       | 123          | 6        | 44         | 1,06  |
| <a href="#">IPI00003309</a> | POLR2H       | 121          | 4        | 39         | 0,5   |
| <a href="#">IPI00293375</a> | RPAP2        | 99           | 10       | 29         | 0,37  |

## SUPPLEMENTAL EXPERIMENTAL PROCEDURES

### *Primers used for chromatin immunoprecipitation analysis*

Regions amplified by each pair of primers on the *RNU2* locus (Accession Number U57614) and the  *$\beta$ -actin* gene (Accession number M10277) are indicated relative to the transcription start site.

|   | <i>U2 snRNA gene</i> |   | <i><math>\beta</math>-actin gene</i> |
|---|----------------------|---|--------------------------------------|
| 1 | -2000/-1819          | 1 | -609/-479                            |
| 2 | -40/+35              | 2 | -169/-10                             |
| 3 | +259/+355            | 3 | +222/+361                            |
| 4 | +480/+588            | 4 | +742/+911                            |
| 5 | +647/+753            |   |                                      |
| 6 | +765/+906            |   |                                      |
| 7 | +1432/+1573          |   |                                      |

### *Immunofluorescence*

Transfected HeLa cells were fixed in 4% paraformaldehyde in PBS for 30 minutes at room temperature and permeabilized overnight at 4°C in 70% ethanol. Coverslips were then blocked in 1% BSA diluted in PBS for 45 minutes and incubated with the primary antibody (anti-Flag) diluted in the blocking solution, for 2 hours at room temperature. After three washes with PBS, cells were incubated for 1 hour with the secondary antibody (anti-mouse, FITC), diluted in the blocking solution and washed three times with PBS. Coverslips were mounted in Moviol DAPI. Images were captured with a CoolSnap ES camera (Roper Scientific, Tucson, AZ) mounted on a microscope (model DMRA, Leica, Deerfield, IL) with a Leica 100x plan Apo 1.4.

### *Mass spectrometry analysis*

The sample was run just 5mm into the top of a 4-12% gradient gel. The top of the gel was excised and chopped into 1mm<sup>3</sup> cubes and destained with 25 mM ammonium bicarbonate in 50% acetonitrile. The gel pieces were reduced with 10 mM DTT at 37°C for 30 minutes and alkylated with 55mM iodoacetamide for 1 hour and digested with trypsin for 16 hours. Digests were stopped by addition of acetic acid and the peptides desalted on an in-house manufactured C18 device.

Tryptic digests were analysed on a Thermo LTQ orbitrap mass spectrometer coupled to a Dionex U3000 nano HPLC system. Samples were analysed on 120 minutes LC/MS/MS gradient on a 15 cm long by 75 micron inner diameter nano-column packed in-house with C18 material (Reprosil-Pur C18-Aq, 3 micron diameter beads, Dr Maisch).

Mass spectrometer was run in a data-dependent "Top 5" method in which 2+, 3+ and 4+ ions were selected for fragmentation.

Data were analysed using Mascot searched against IPI human (ipi.HUMAN.v3.76). Mass tolerance for precursor was 20 ppm and fragment mass tolerance was 0.5 Da. Fixed

modification was defined as carbamidomethyl (C) and variable modifications allowed were oxidation (M), acetylation (protein N-terminal), Deamidation (NQ) and phospho (STY). Criteria for acceptance of Mascot identification were defined as followed: Mascot score=60, with at least 2 unique peptides with length of greater than 8 amino-acids (Table S1). Frequent Flag-IP contaminant proteins were removed from our dataset (Table S2), according to the list published by Dunham et al, (2011).

#### **SUPPLEMENTAL REFERENCES**

Dunham, W. H., Larsen, B., Tate, S., Badillo, B. G., Goudreault, M., Tehami, Y., Kislinger, T., and Gingras, A. C. (2011) A cost-benefit analysis of multidimensional fractionation of affinity purification-mass spectrometry samples. *Proteomics* *11*, 2603-2612.
